# Supplementary material
Source: PubMed Central journal article supplement (PMC4386453)
Supplement: MCB.00077-14_zmb999100618so1.pdf [file MCB.00077-14_zmb999100618so1.pdf]

## Supplemental Fig. 1

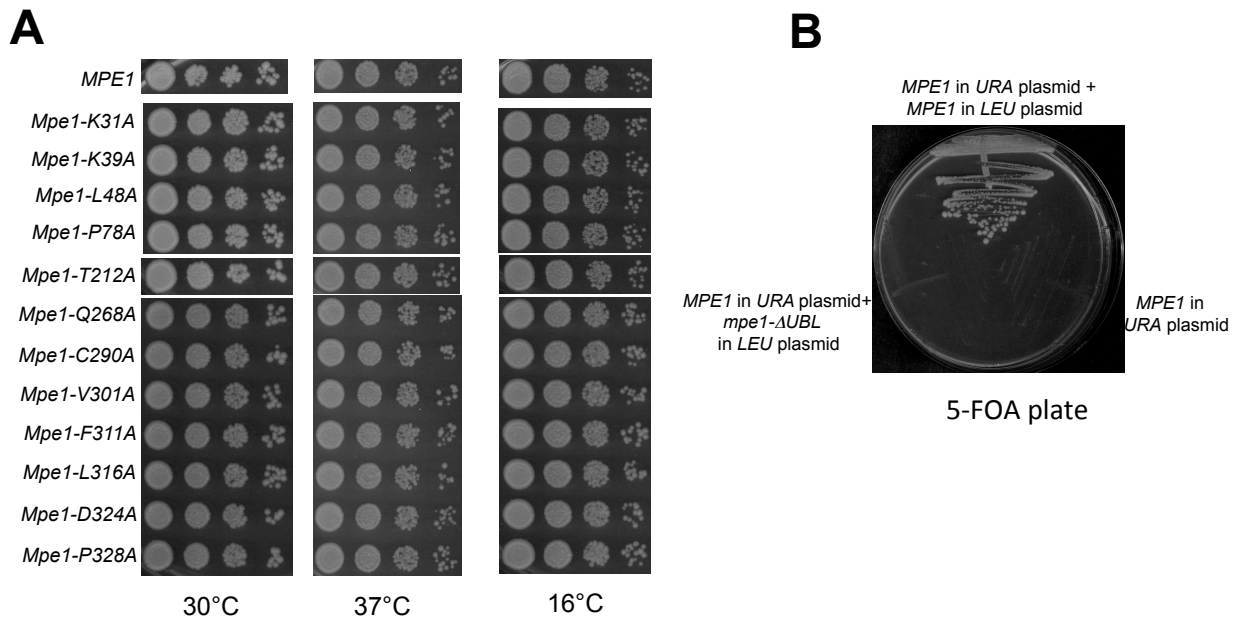

**Supplemental Figure 1. Growth phenotypes of additional *mpe1* mutants. (A)** Point mutations in 12 conserved residues of Mpe1 do not cause growth defects on rich medium at different temperatures. Strains were grown in liquid YPD, and 10-fold serial dilutions were spotted on YPD plates and incubated for 3-7 days at the indicated temperatures. **(B)** *mpe1-ΔUBL* is not viable. Strains containing indicated plasmids were streaked on 5-FOA plate to counter select for the *MPE1-URA* plasmid.

## Supplemental Fig. 2

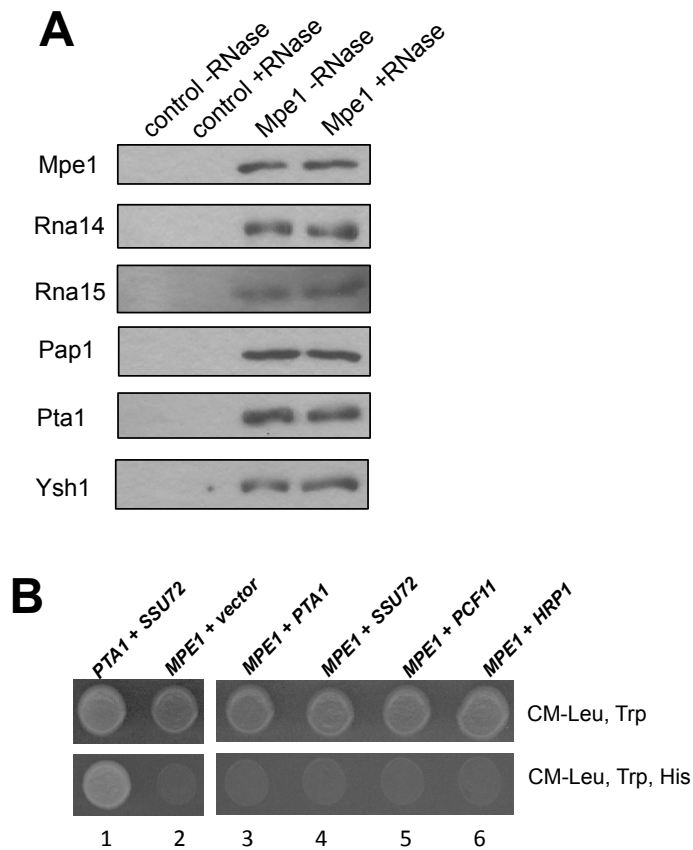

**Supplemental Figure 2. (A)** Interactions of Mpe1 with other processing complex subunits are not mediated by RNA. Pull-down assays were performed as described for Figure 3 except that nickel affinity beads were either treated with or without RNase A/T1 cocktail for 40 minutes at 30°C as indicated above the lanes. Controls were performed using extract from cells expressing untagged Mpe1. **(B)** Negative two-hybrid interactions between Mpe1 and a subset of polyadenylation factors. Yeast two-hybrid analyses were performed as described for Figures 3. The pairings of two-hybrid constructs are as follows: 1) pGBD-*PTA1* + pGAD-*SSU72*, 2) pGBD-*MPE1* + pGAD, 3) pGBD-*MPE1* + pGAD-*PTA1*, 4) pGBD-*MPE1* + pGAD-*SSU72*, 5) pGBD-*MPE1* + pGAD-*PCF11*, and 6) pGBD-*MPE1* + pGAD-*HRP1*.
